# Supplementary material
Source: publisher site journal article supplement (https://static.cambridge.org/content/id/urn:cambridge.org:id:article:S0002731618000173/resource/name/Supplemental_Text_1.docx)
Supplement: Supplementary file 1 [file Supplemental_Text_1.docx]

Supplemental Text 1. Forest Depths.

Kashaya oral traditions, as transcribed by Oswalt (1964:255-259, 273-275), describe the outlying areas away from Fort Ross as the “forest depths” where “the Indians were living [apart from the Russian settlement].” These narratives suggest that while animosity often existed between different groups in the hinterland, these hostilities abated somewhat during the occupation of Colony Ross. Russian texts provide eyewitness accounts of some of the outlying settlements both near and far from the Ross settlement, as well as census data indicating Native women moved freely between the Ross Colony and their homeland villages when interethnic households dissolved (e.g., Golovnin 1979; Istomin 1992; Kostromitinov 2012; Laplace 2012; Wrangell 1974)(see Supplemental Text 4 for references cited).
